# Supplementary material
Source: publisher figshare collection journal article supplement (https://acs.figshare.com/ndownloader/files/4493809)

# Supporting Information

## Tampering with Molecular Cohesion in Crystals of Hexaphenylbenzenes

Eric Gagnon,<sup>†</sup> Shira D. Halperin,<sup>‡</sup> Valérie Métivaud,<sup>†</sup>

Kenneth E. Maly,<sup>‡</sup> and James D. Wuest<sup>†\*</sup>

<sup>†</sup>*Département de Chimie, Université de Montréal, Montréal, Québec H3C 3J7 Canada*

<sup>‡</sup>*Department of Chemistry, Wilfrid Laurier University, Waterloo, Ontario N2L 3C5 Canada*

| Content                                                                                                           | Page           |
|-------------------------------------------------------------------------------------------------------------------|----------------|
| I. <b>Figure S1.</b> ORTEP view of the structure of compound <b>3b</b> .....                                      | <b>S2</b>      |
| II. <b>Figure S2.</b> ORTEP view of the structure of compound <b>3c</b> .....                                     | <b>S3</b>      |
| III. <b>Figure S3.</b> ORTEP view of the structure of compound <b>3d</b> .....                                    | <b>S4</b>      |
| IV. <b>Figure S4.</b> ORTEP view of the structure of compound <b>3e</b> .....                                     | <b>S5</b>      |
| V. General procedure for the confirmation of bulk homogeneity by powder X-ray diffraction (PXRD).....             | <b>S6</b>      |
| VI. <b>Figures S5-S6.</b> Comparison of experimental and calculated PXRD patterns for compound <b>3b</b> .....    | <b>S7-S8</b>   |
| VII. <b>Table S1.</b> Crystallographic data for compound <b>3b</b> determined by Pawley fitting at 295 K.....     | <b>S8</b>      |
| VIII. <b>Figures S7-S8.</b> Comparison of experimental and calculated PXRD patterns for compound <b>3c</b> .....  | <b>S9-S10</b>  |
| IX. <b>Table S2.</b> Crystallographic data for compound <b>3c</b> determined by Pawley fitting at 295 K.....      | <b>S10</b>     |
| X. <b>Figures S9-S10.</b> Comparison of experimental and calculated PXRD patterns for compound <b>3d</b> .....    | <b>S11-S12</b> |
| XI. <b>Table S3.</b> Crystallographic data for compound <b>3d</b> determined by Pawley fitting at 295 K.....      | <b>S12</b>     |
| XII. <b>Figures S11-S12.</b> Comparison of experimental and calculated PXRD patterns for compound <b>3e</b> ..... | <b>S13-S14</b> |
| XIII. <b>Table S4.</b> Crystallographic data for compound <b>3e</b> determined by Pawley fitting at 295 K.....    | <b>S14</b>     |
| XIV. <sup>1</sup> H and <sup>13</sup> C NMR spectra of compounds <b>3b-e</b> and <b>7-9</b> .....                 | <b>S15-S21</b> |

\*Author to whom correspondence may be addressed: [james.d.wuest@umontreal.ca](mailto:james.d.wuest@umontreal.ca)

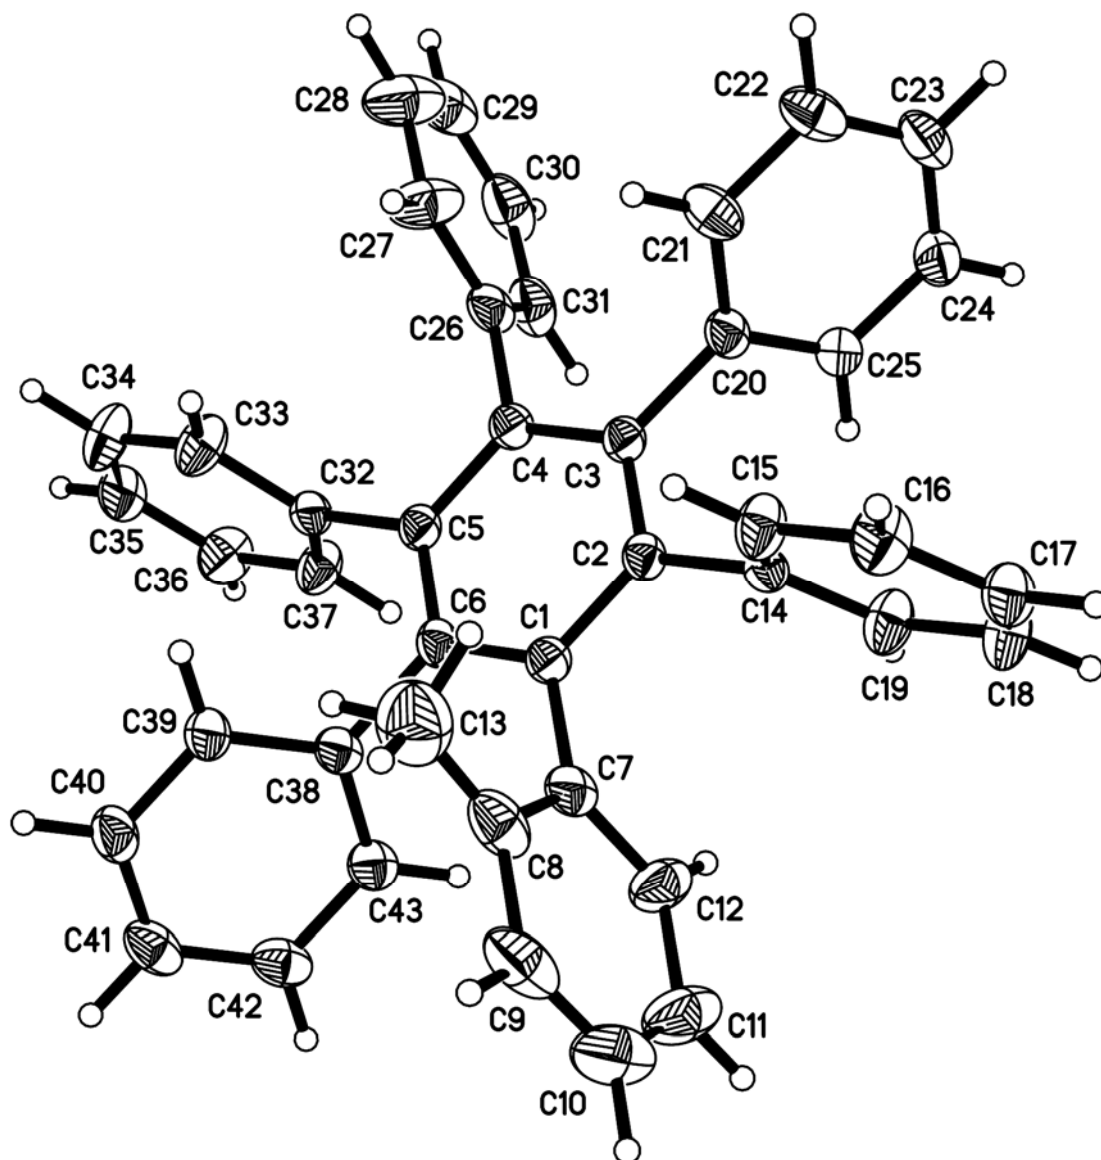

**Figure S1.** ORTEP view of the structure of crystals of 1-(2-methylphenyl)-2,3,4,5,6-pentaphenylbenzene (**3b**) grown from chlorobenzene. The ellipsoids of non-hydrogen atoms are drawn at the 30% probability level, and hydrogen atoms are represented by a sphere of arbitrary size.

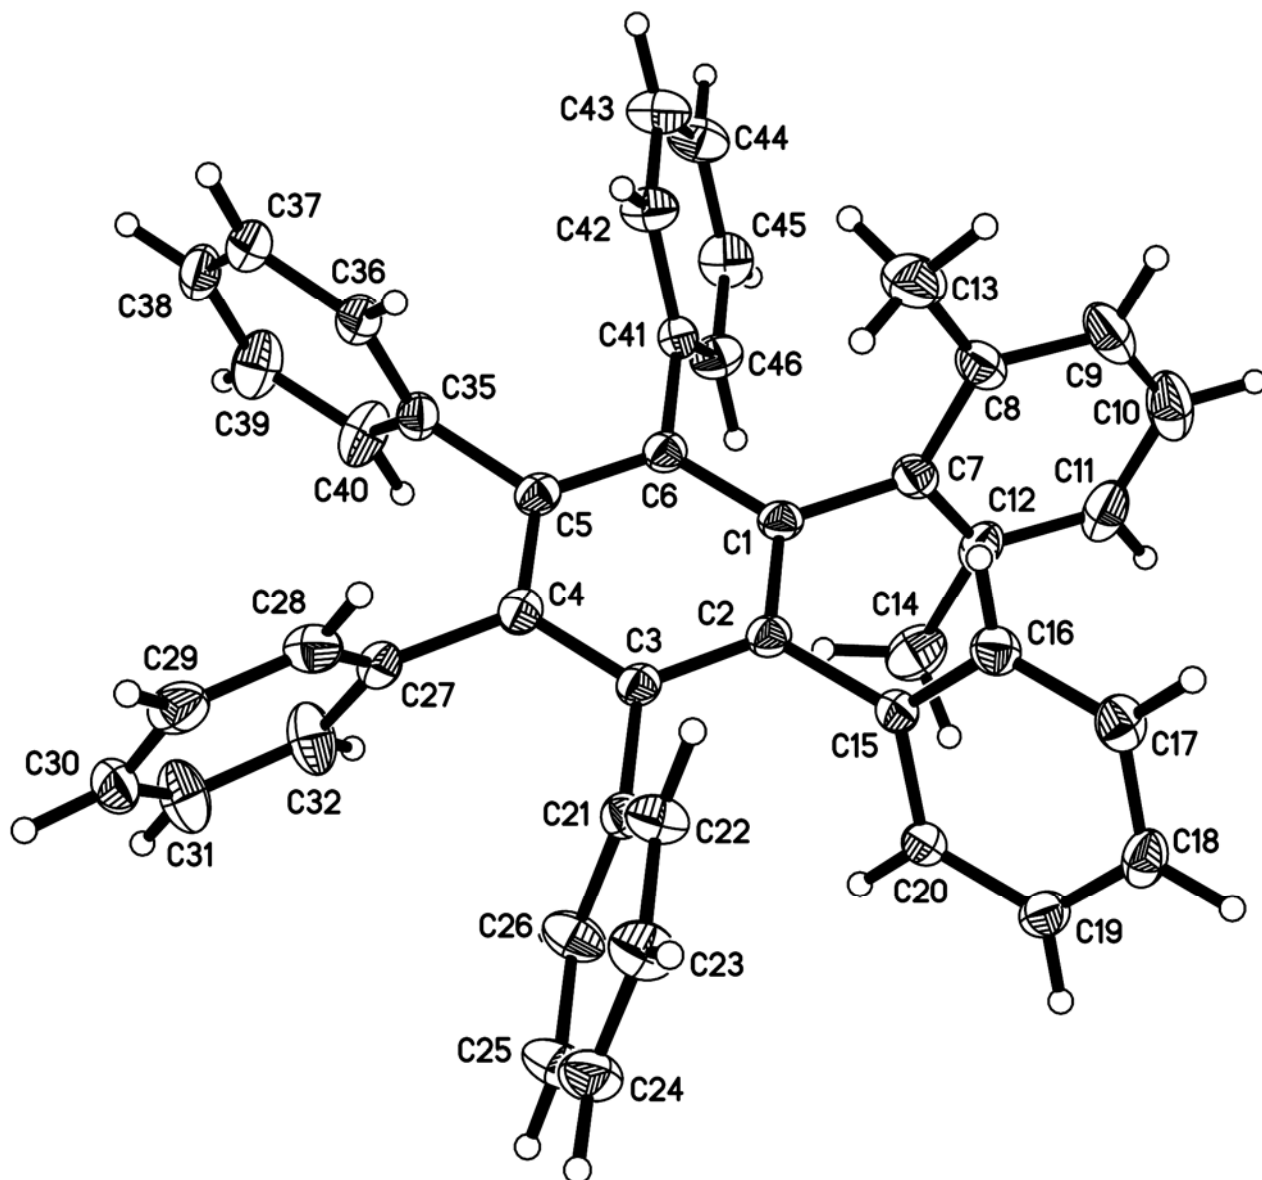

**Figure S2.** ORTEP view of the structure of crystals of 1-(2,6-dimethylphenyl)-2,3,4,5,6-pentaphenylbenzene (**3c**) grown from toluene. The ellipsoids of non-hydrogen atoms are drawn at the 30% probability level, and hydrogen atoms are represented by a sphere of arbitrary size.

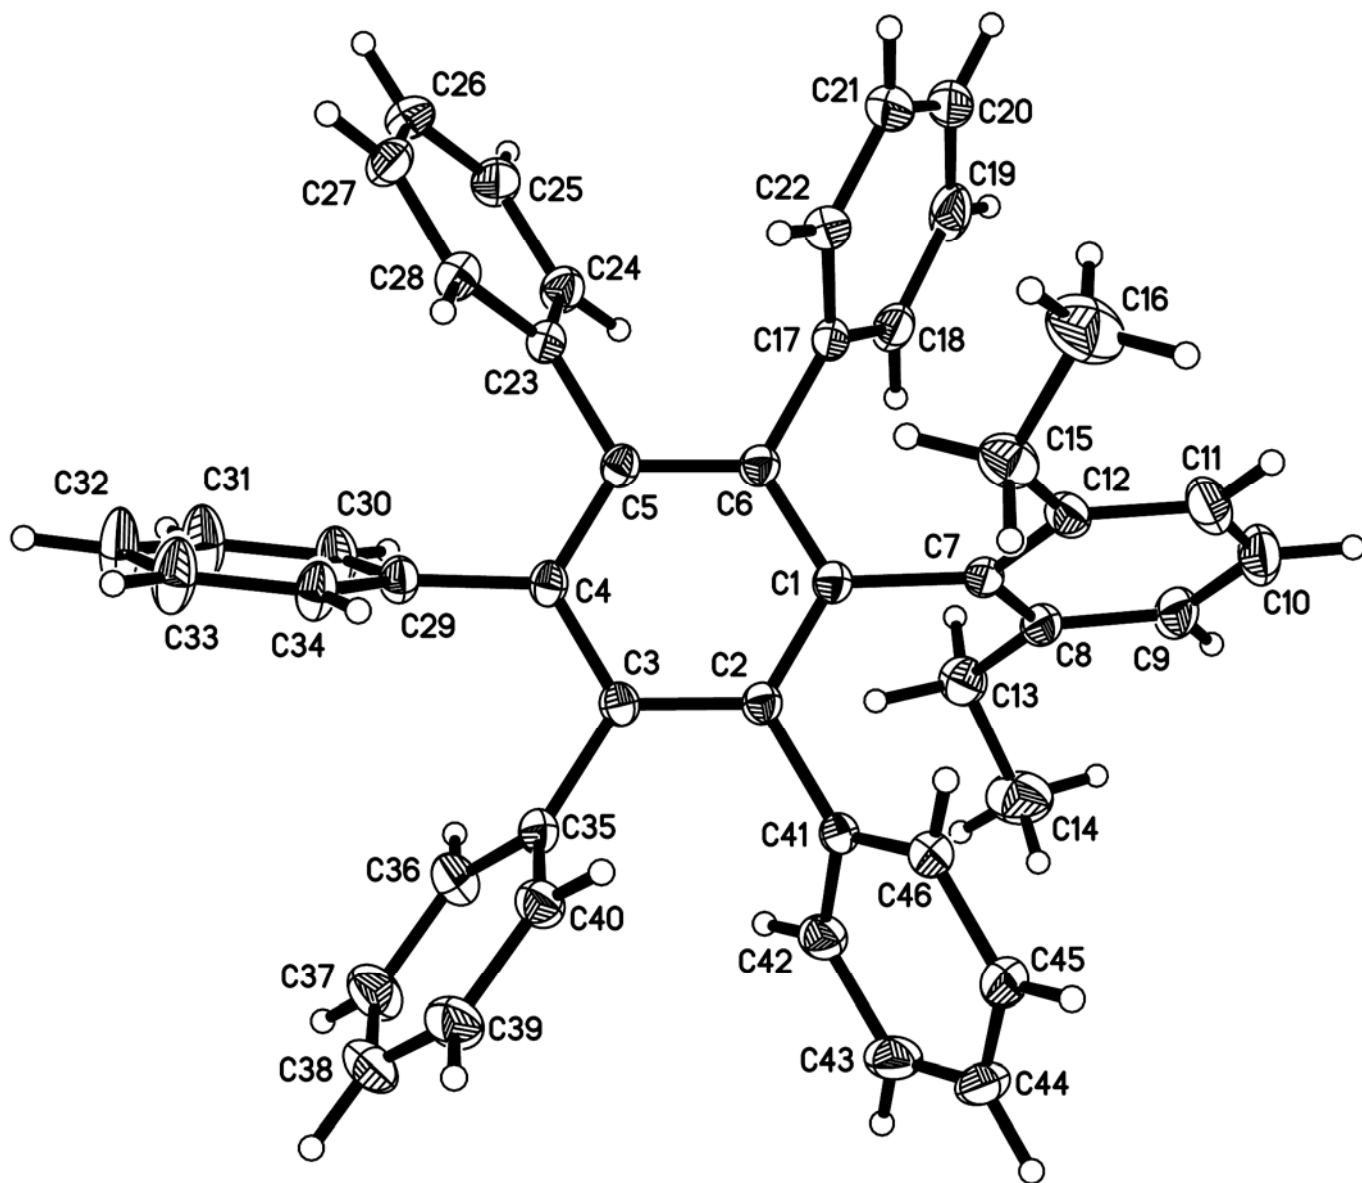

**Figure S3.** ORTEP view of the structure of crystals of 1-(2,6-diethylphenyl)-2,3,4,5,6-pentaphenylbenzene (**3d**) grown from toluene/hexanes. The ellipsoids of non-hydrogen atoms are drawn at the 30% probability level, and hydrogen atoms are represented by a sphere of arbitrary size.

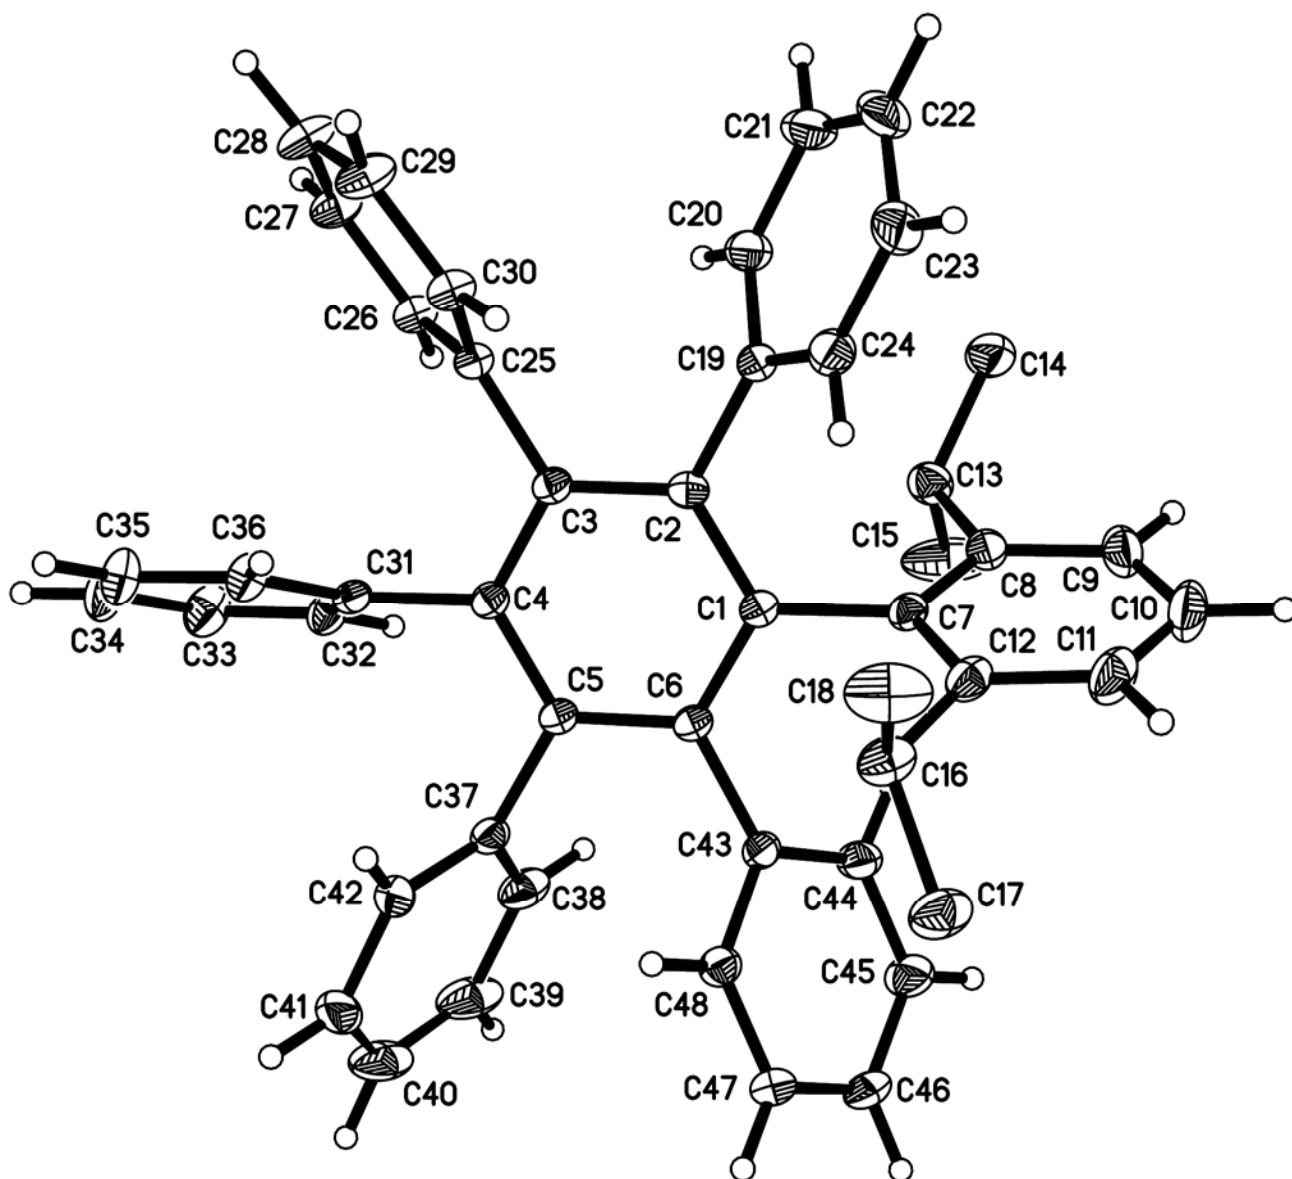

**Figure S4.** ORTEP view of the structure of crystals of 1-(2,6-diisopropylphenyl)-2,3,4,5,6-pentaphenylbenzene (**3e**) grown from toluene/hexanes. The ellipsoids of non-hydrogen atoms are drawn at the 30% probability level, and hydrogen atoms are represented by a sphere of arbitrary size.

## Homogeneity of Bulk Crystalline Samples

In all structural studies, experimental powder X-ray diffraction patterns were recorded for each bulk crystalline sample and then compared with those calculated from single-crystal X-ray diffraction data. In all cases, these comparisons confirmed that the single-crystal specimens selected for structural analysis were representative of the bulk crystalline samples from which they were chosen.

Experimental powder X-ray diffraction patterns were recorded at 25 °C in reflection mode on a Bruker D8 Advance powder X-ray diffractometer equipped with a VÅNTEC-1 linear position-sensitive detector, using Ge-monochromatized Cu K $\alpha_1$  radiation generated at 40 kV and 40 mA. Calibration of the instrument was done with a NIST 1976 corundum sample. For each experiment, the bulk crystalline sample was ground, the resulting powder was placed in a sample holder (PMMA holder ring), and the surface of the powder was flattened with a glass plate. Data were collected in Bragg-Brentano geometry in the range  $2^\circ < 2\theta < 50^\circ$  with a step size of  $0.016^\circ$  and a counting time of 2s/step.

Structural data from single-crystal analyses were used to calculate theoretical powder X-ray diffraction patterns with the aid of Mercury software. Peak fitting and the refinement of lattice parameters were carried out using TOPAS software (Bruker), and Pawley fitting was applied to the powder X-ray diffraction patterns. All experimental and calculated diffraction patterns were plotted in the most pertinent range ( $5^\circ < 2\theta < 35^\circ$ ). The x-scale of the experimental pattern was shifted to minimize the slight angular shift due to the effect of temperature.

PXRD Data for Compound **3b**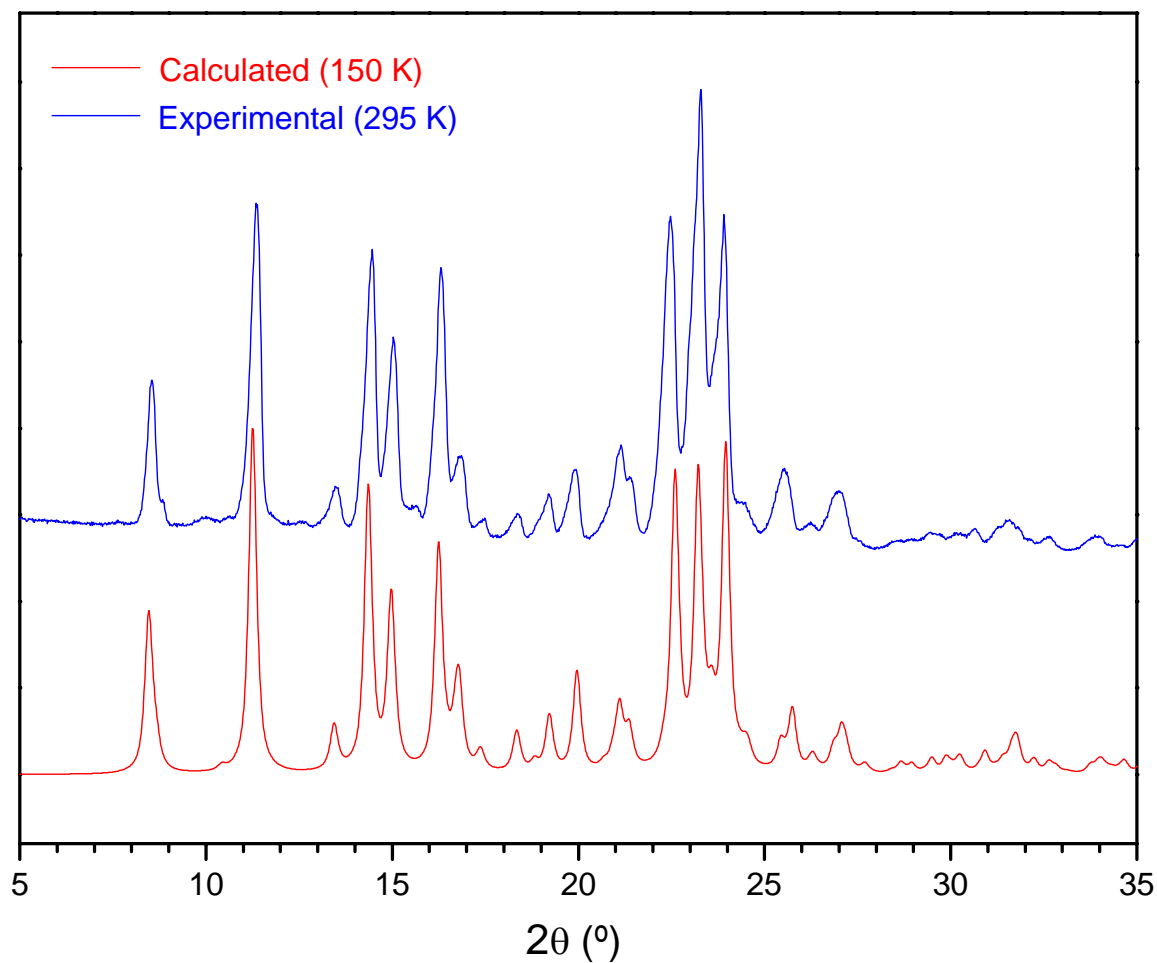

**Figure S5.** Comparison of experimental and calculated powder X-ray diffraction patterns of compound **3b**.

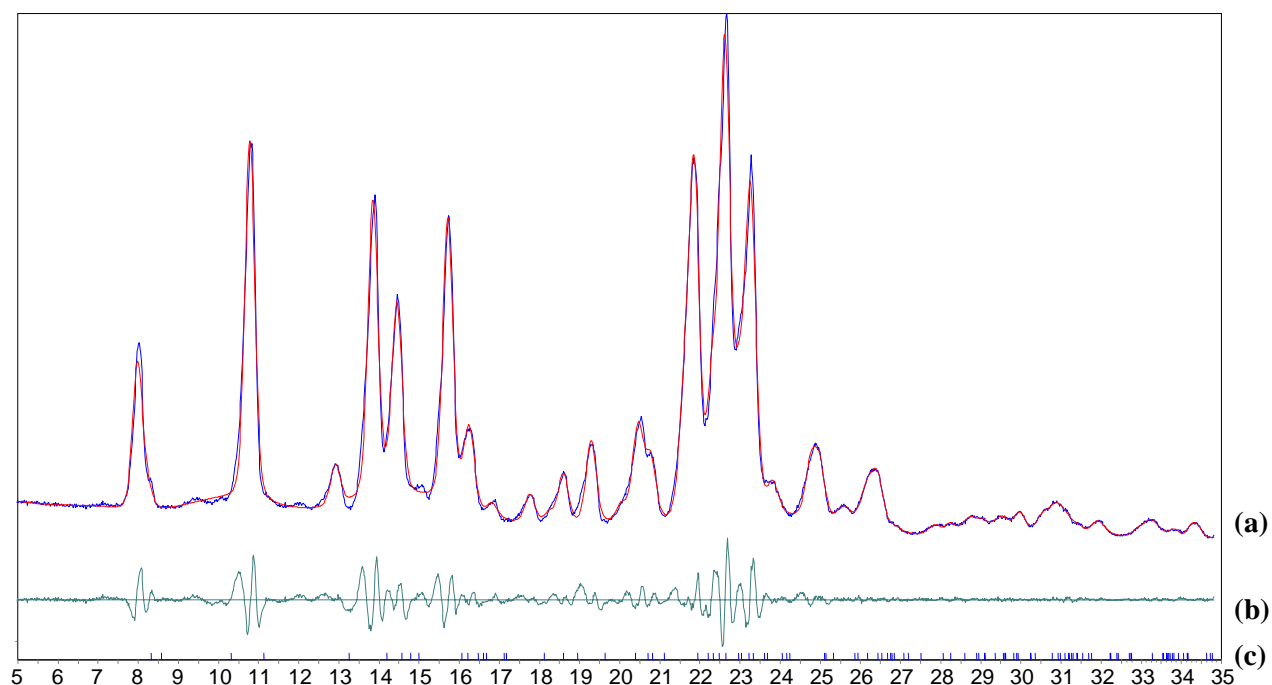

**Figure S6.** (a) Simulated powder X-ray diffraction pattern of crystals of compound **3b** (red curve) as determined by Pawley fitting of the experimental powder X-ray diffraction pattern (nearly superimposed blue curve). (b) Difference between experimental and calculated intensities. (c) Position of calculated reflections.

**Table S1.** Crystallographic Data for Compound **3b** as Determined by Pawley Fitting of Powder X-Ray Diffraction Data at 295 K.

| Compound                   | C <sub>43</sub> H <sub>32</sub> |
|----------------------------|---------------------------------|
| temperature (K)            | 295                             |
| crystal system             | orthorhombic                    |
| space group                | <i>Pna</i> 2 <sub>1</sub>       |
| <i>a</i> (Å)               | 12.4098 (29)                    |
| <i>b</i> (Å)               | 11.7731 (34)                    |
| <i>c</i> (Å)               | 21.1504 (45)                    |
| $\alpha$ (°)               | 90                              |
| $\beta$ (°)                | 90                              |
| $\gamma$ (°)               | 90                              |
| <i>V</i> (Å <sup>3</sup> ) | 3090.1 (13)                     |
| <i>Z</i>                   | 4                               |



PXRD Data for Compound **3c**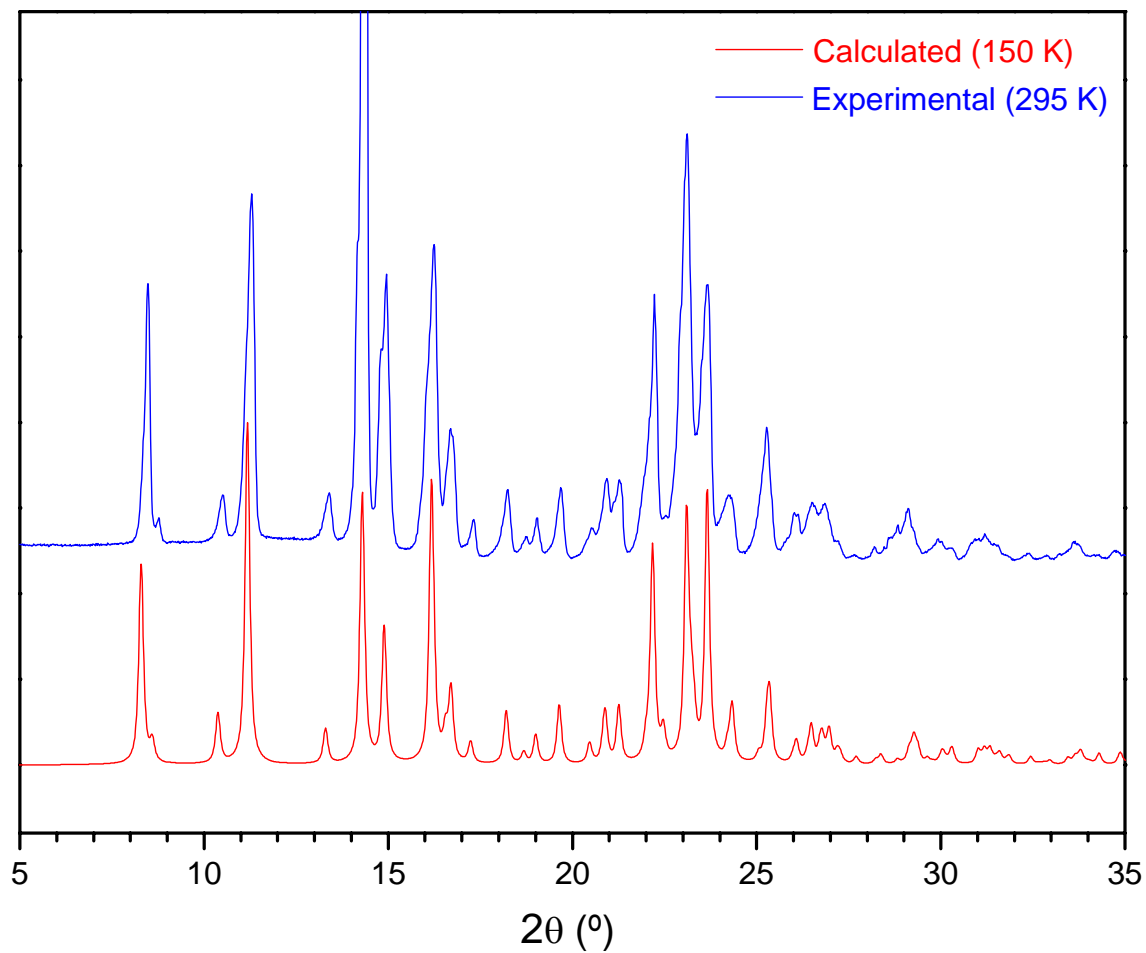

**Figure S7.** Comparison of experimental and calculated powder X-ray diffraction patterns of compound **3c**.

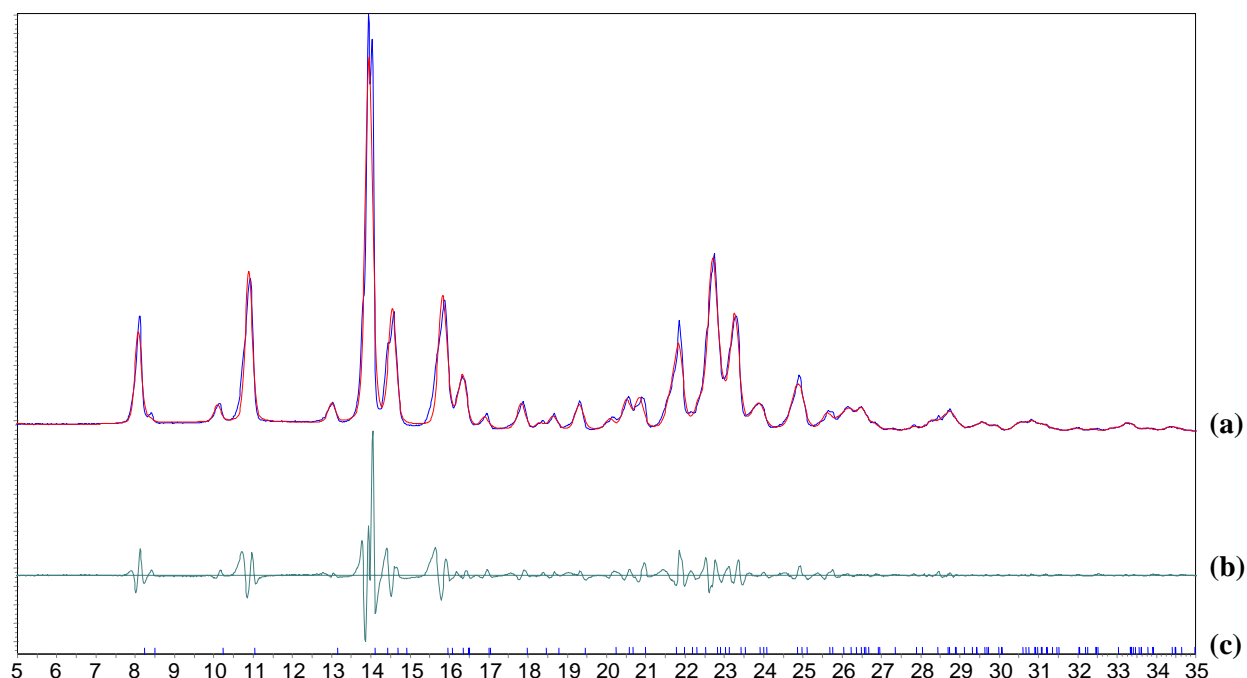

**Figure S8.** (a) Simulated powder X-ray diffraction pattern of crystals of compound **3c** (red curve) as determined by Pawley fitting of the experimental powder X-ray diffraction pattern (nearly superimposed blue curve). (b) Difference between experimental and calculated intensities. (c) Position of calculated reflections.

**Table S2.** Crystallographic Data for Compound **3c** as Determined by Pawley Fitting of Powder X-Ray Diffraction Data at 295 K.

| Compound                   | C <sub>44</sub> H <sub>34</sub> |
|----------------------------|---------------------------------|
| temperature (K)            | 295                             |
| crystal system             | orthorhombic                    |
| space group                | <i>Pna</i> 2 <sub>1</sub>       |
| <i>a</i> (Å)               | 12.5493 (32)                    |
| <i>b</i> (Å)               | 11.8791 (45)                    |
| <i>c</i> (Å)               | 21.4742 (67)                    |
| $\alpha$ (°)               | 90                              |
| $\beta$ (°)                | 90                              |
| $\gamma$ (°)               | 90                              |
| <i>V</i> (Å <sup>3</sup> ) | 3201.3 (18)                     |
| <i>Z</i>                   | 4                               |

PXRD Data for Compound **3d**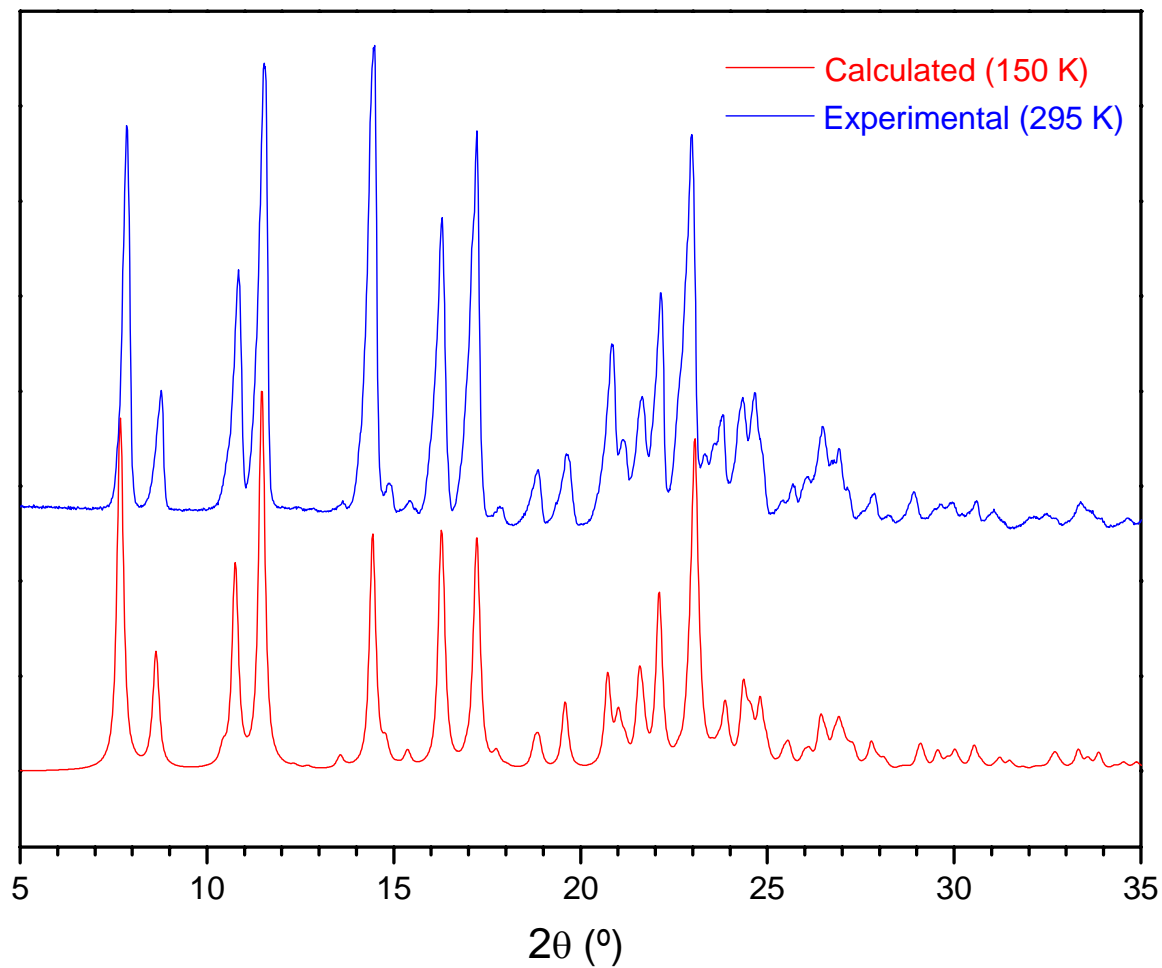

**Figure S9.** Comparison of experimental and calculated powder X-ray diffraction patterns of compound **3d**.

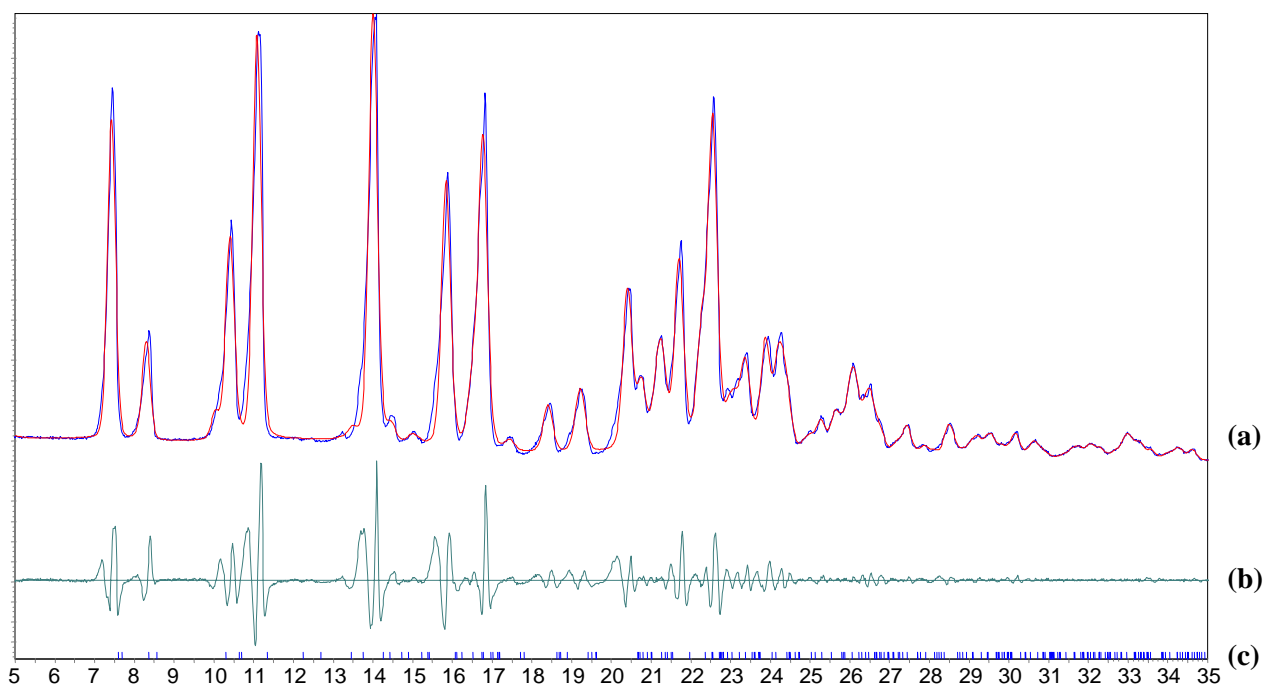

**Figure S10.** (a) Simulated powder X-ray diffraction pattern of crystals of compound **3d** (red curve) as determined by Pawley fitting of the experimental powder X-ray diffraction pattern (nearly superimposed blue curve). (b) Difference between experimental and calculated intensities. (c) Position of calculated reflections.

**Table S3.** Crystallographic Data for Compound **3d** as Determined by Pawley Fitting of Powder X-Ray Diffraction Data at 295 K.

| Compound                   | C <sub>46</sub> H <sub>38</sub> |
|----------------------------|---------------------------------|
| temperature (K)            | 295                             |
| crystal system             | monoclinic                      |
| space group                | <i>P2<sub>1</sub>/n</i>         |
| <i>a</i> (Å)               | 12.535 (13)                     |
| <i>b</i> (Å)               | 11.889 (13)                     |
| <i>c</i> (Å)               | 23.200 (37)                     |
| $\alpha$ (°)               | 90                              |
| $\beta$ (°)                | 98.15 (12)                      |
| $\gamma$ (°)               | 90                              |
| <i>V</i> (Å <sup>3</sup> ) | 3422.6 (76)                     |
| <i>Z</i>                   | 4                               |

PXRD Data for Compound **3e**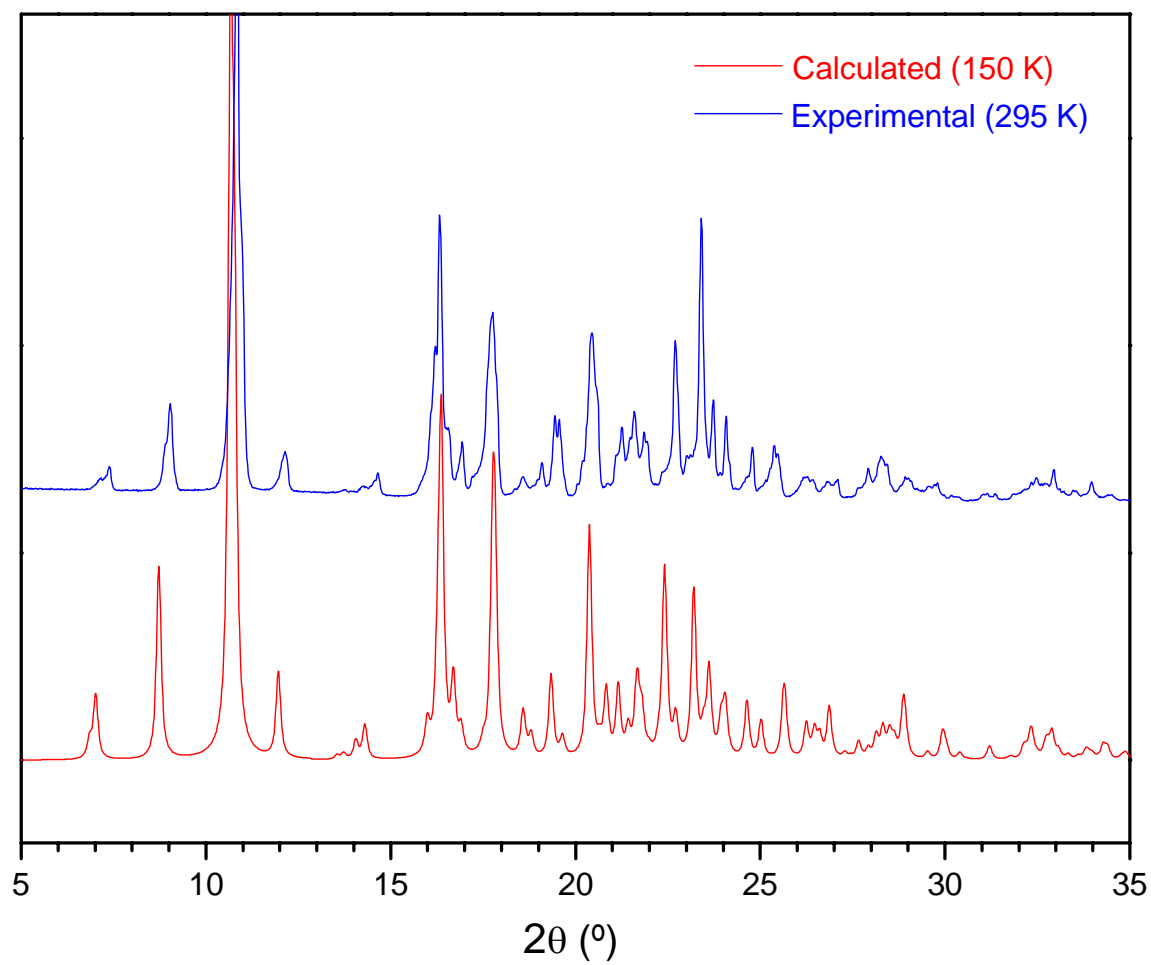

**Figure S11.** Comparison of experimental and calculated powder X-ray diffraction patterns of compound **3e**.

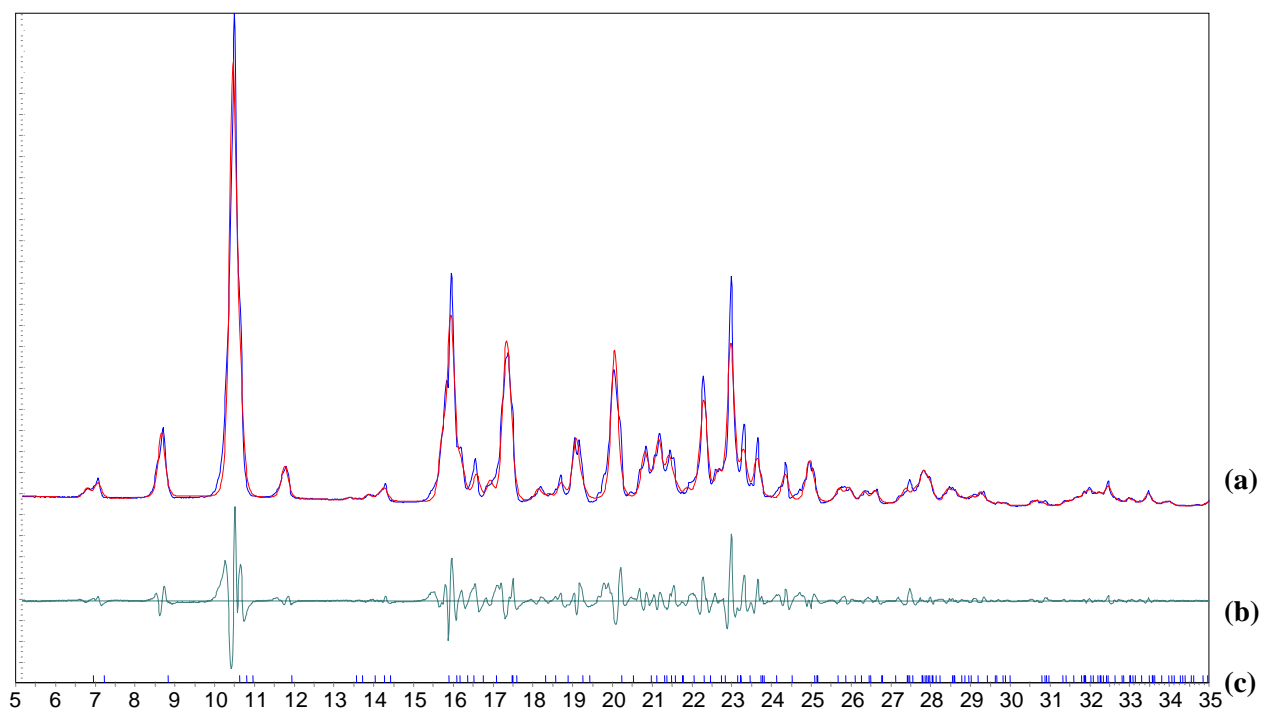

**Figure S12.** (a) Simulated powder X-ray diffraction pattern of crystals of compound **3e** (red curve) as determined by Pawley fitting of the experimental powder X-ray diffraction pattern (nearly superimposed blue curve). (b) Difference between experimental and calculated intensities. (c) Position of calculated reflections.

**Table S4.** Crystallographic Data for Compound **3e** as Determined by Pawley Fitting of Powder X-Ray Diffraction Data at 295 K.

| Compound                   | C <sub>48</sub> H <sub>42</sub> |
|----------------------------|---------------------------------|
| temperature (K)            | 295                             |
| crystal system             | monoclinic                      |
| space group                | <i>P</i> 2 <sub>1</sub>         |
| <i>a</i> (Å)               | 12.8232 (30)                    |
| <i>b</i> (Å)               | 11.0875 (45)                    |
| <i>c</i> (Å)               | 13.3414 (32)                    |
| <i>α</i> (°)               | 90                              |
| <i>β</i> (°)               | 102.489 (17)                    |
| <i>γ</i> (°)               | 90                              |
| <i>V</i> (Å <sup>3</sup> ) | 1851.96 (98)                    |
| <i>Z</i>                   | 2                               |

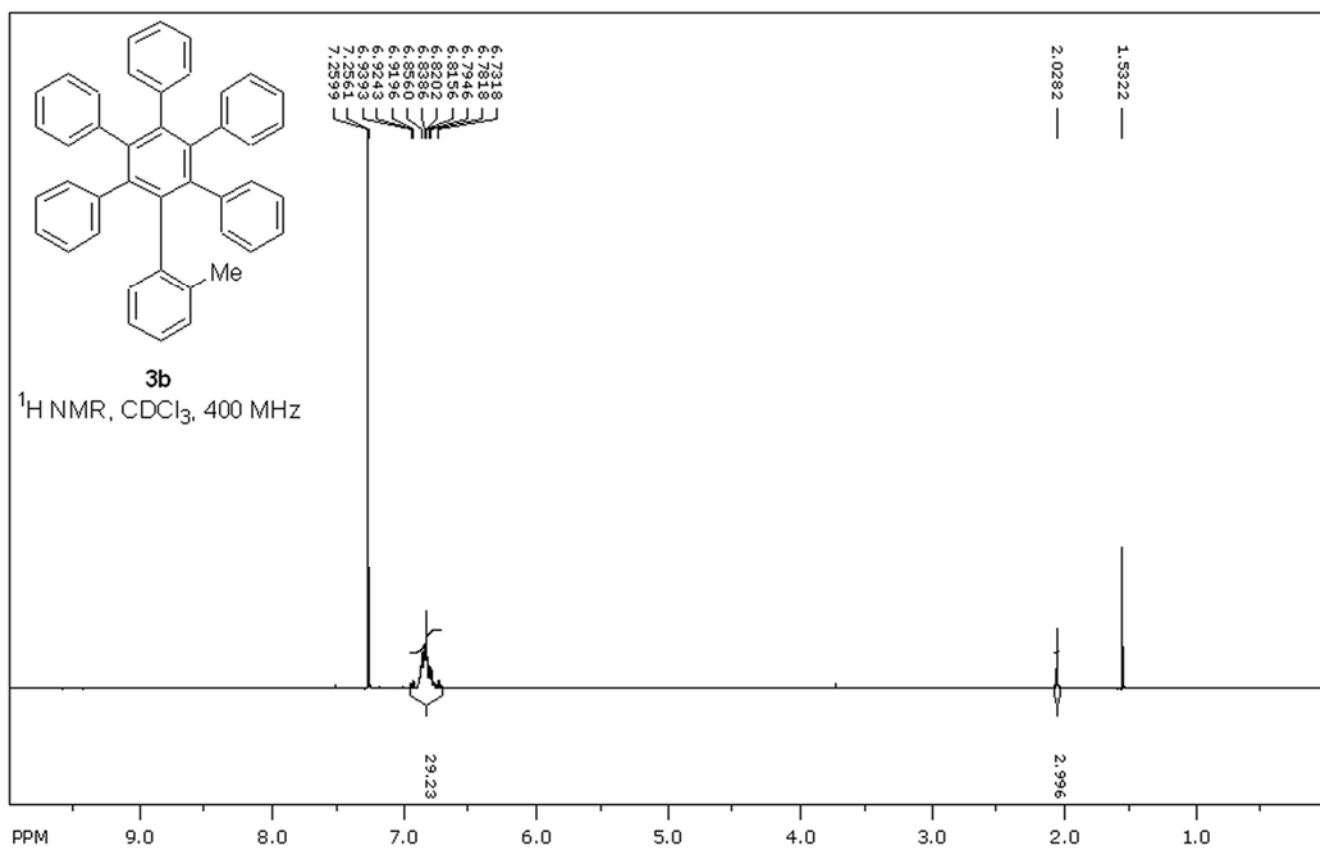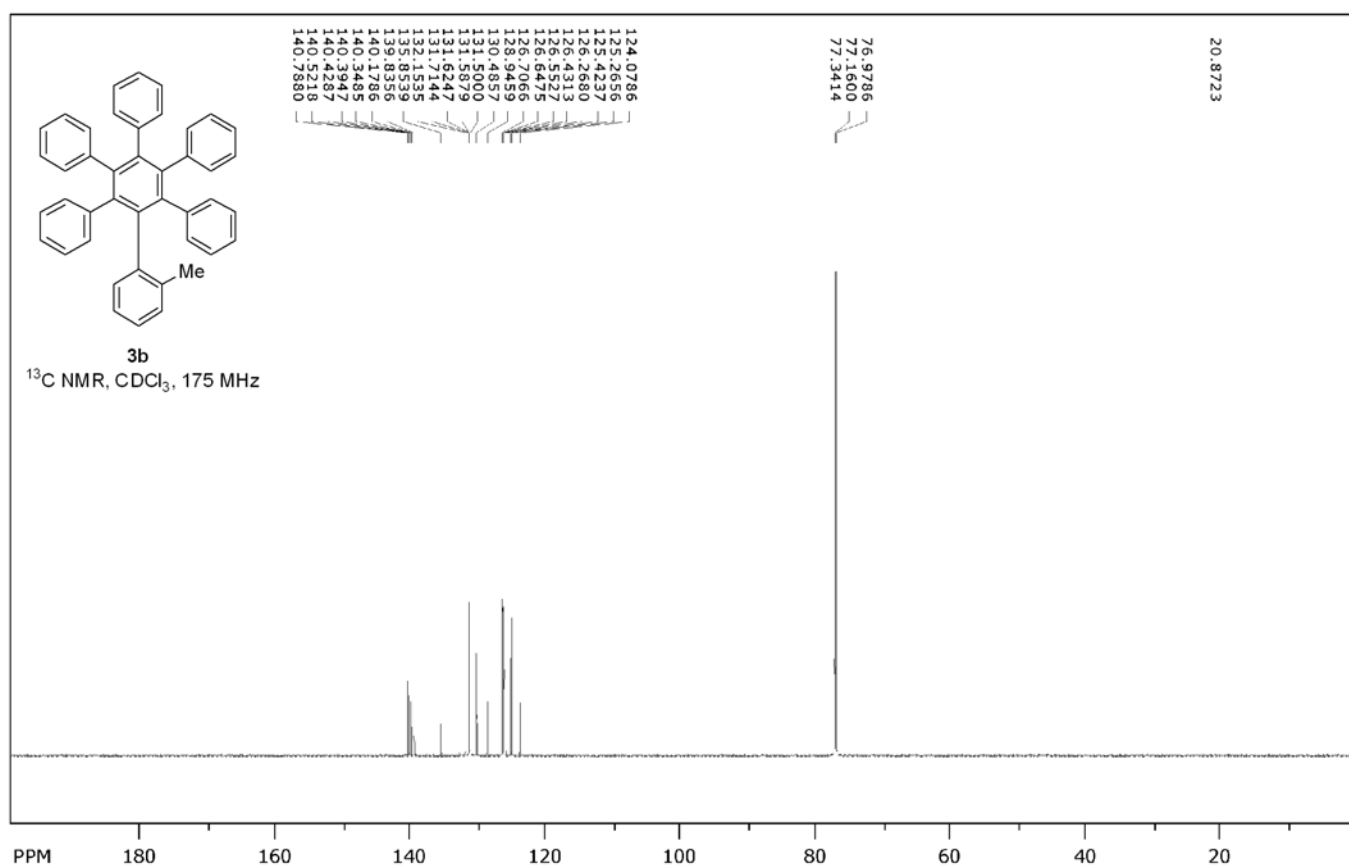

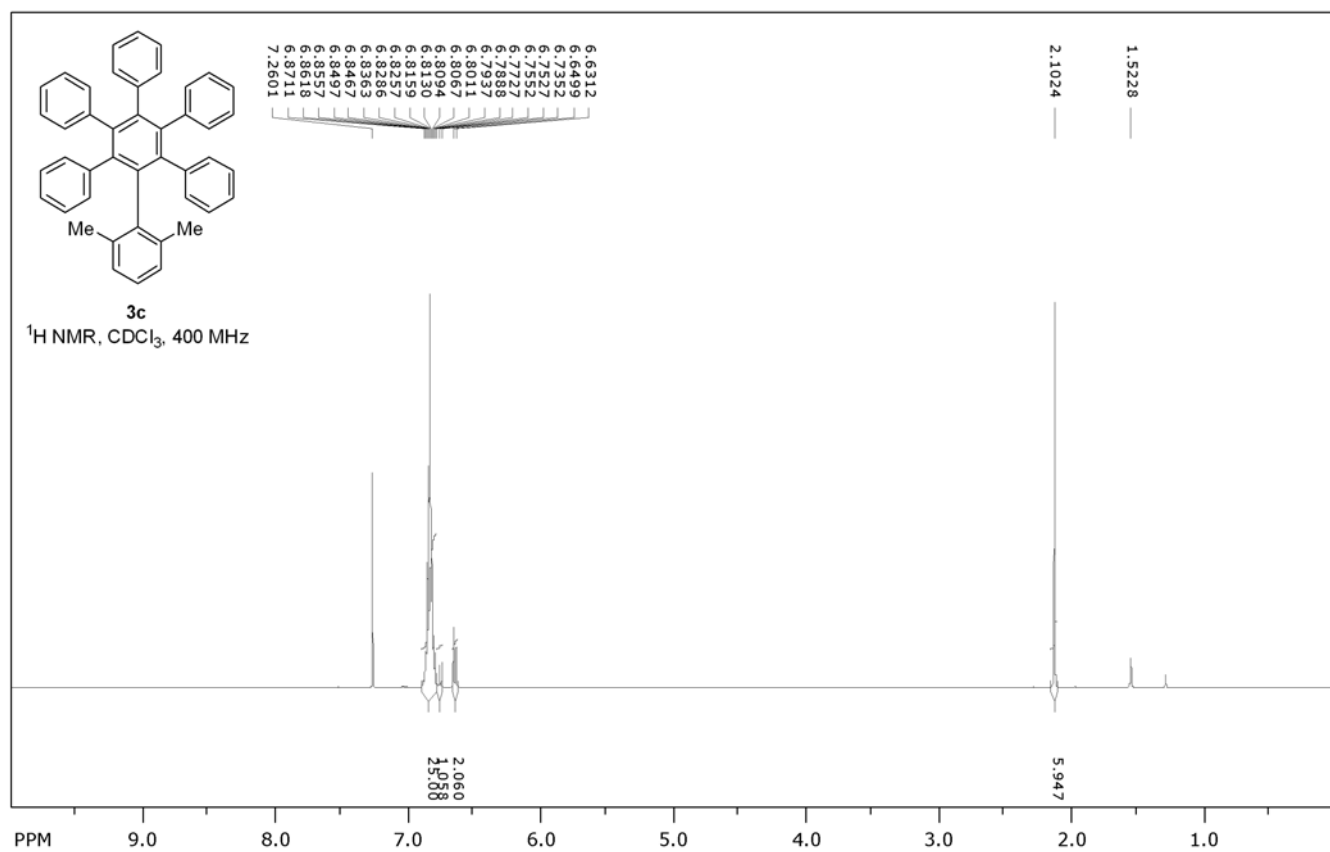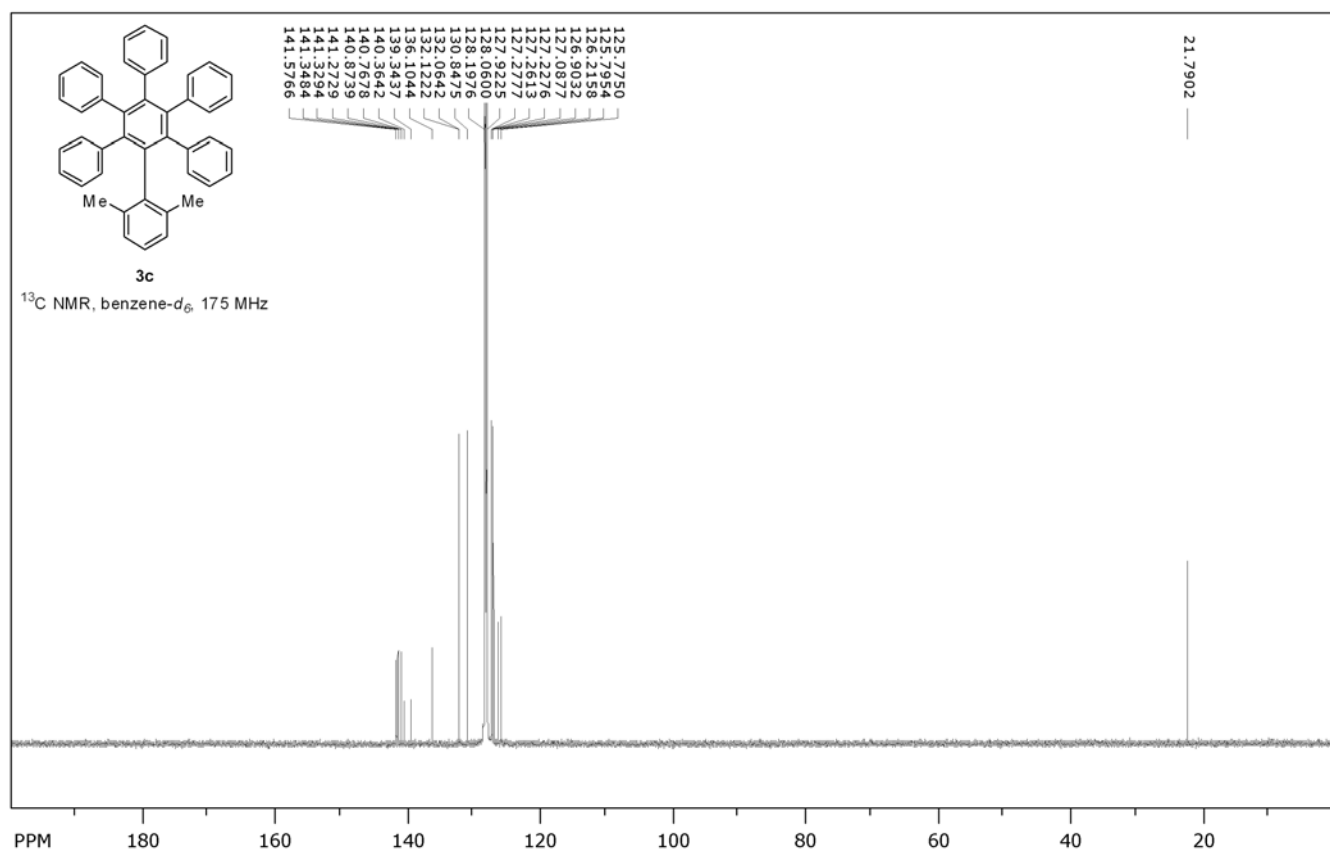



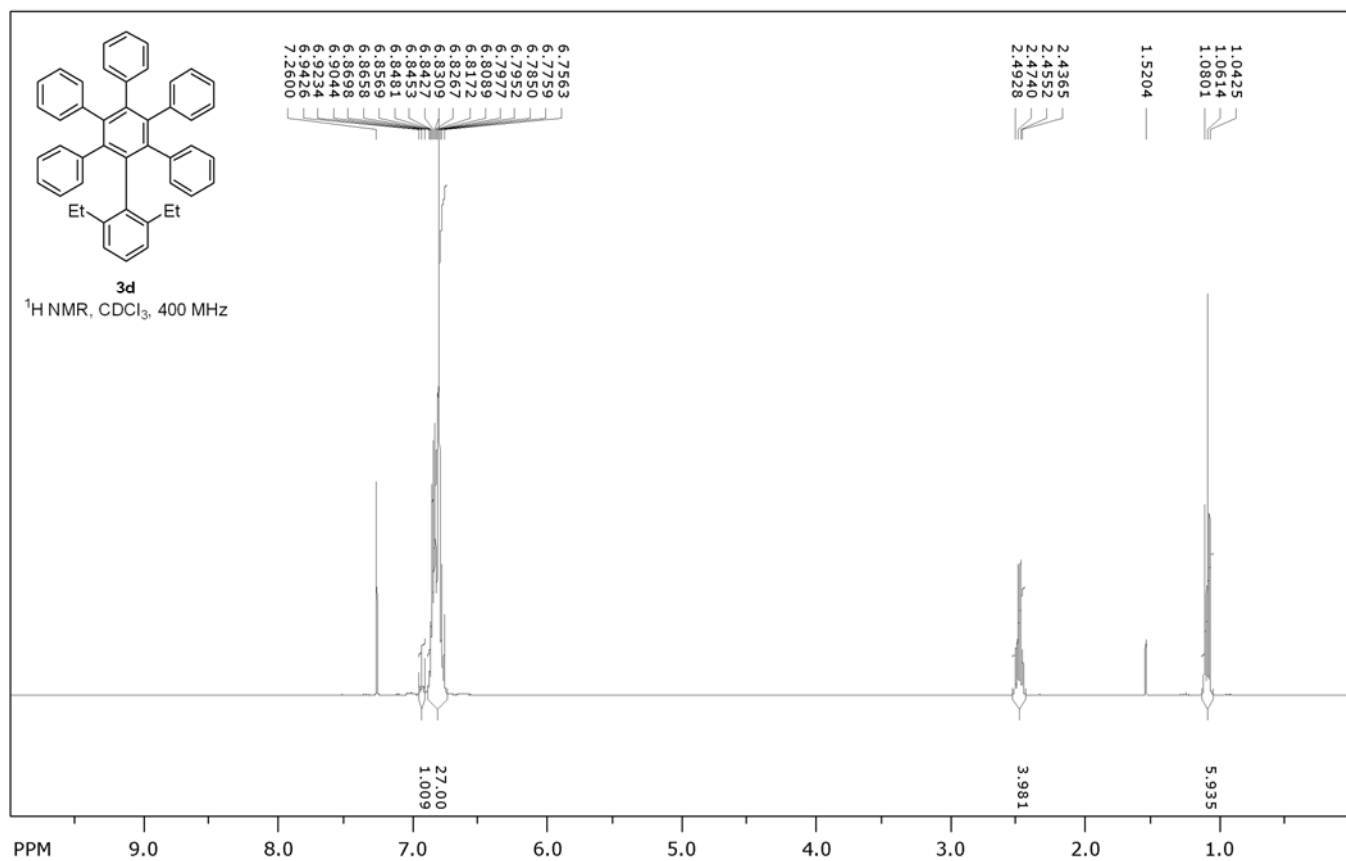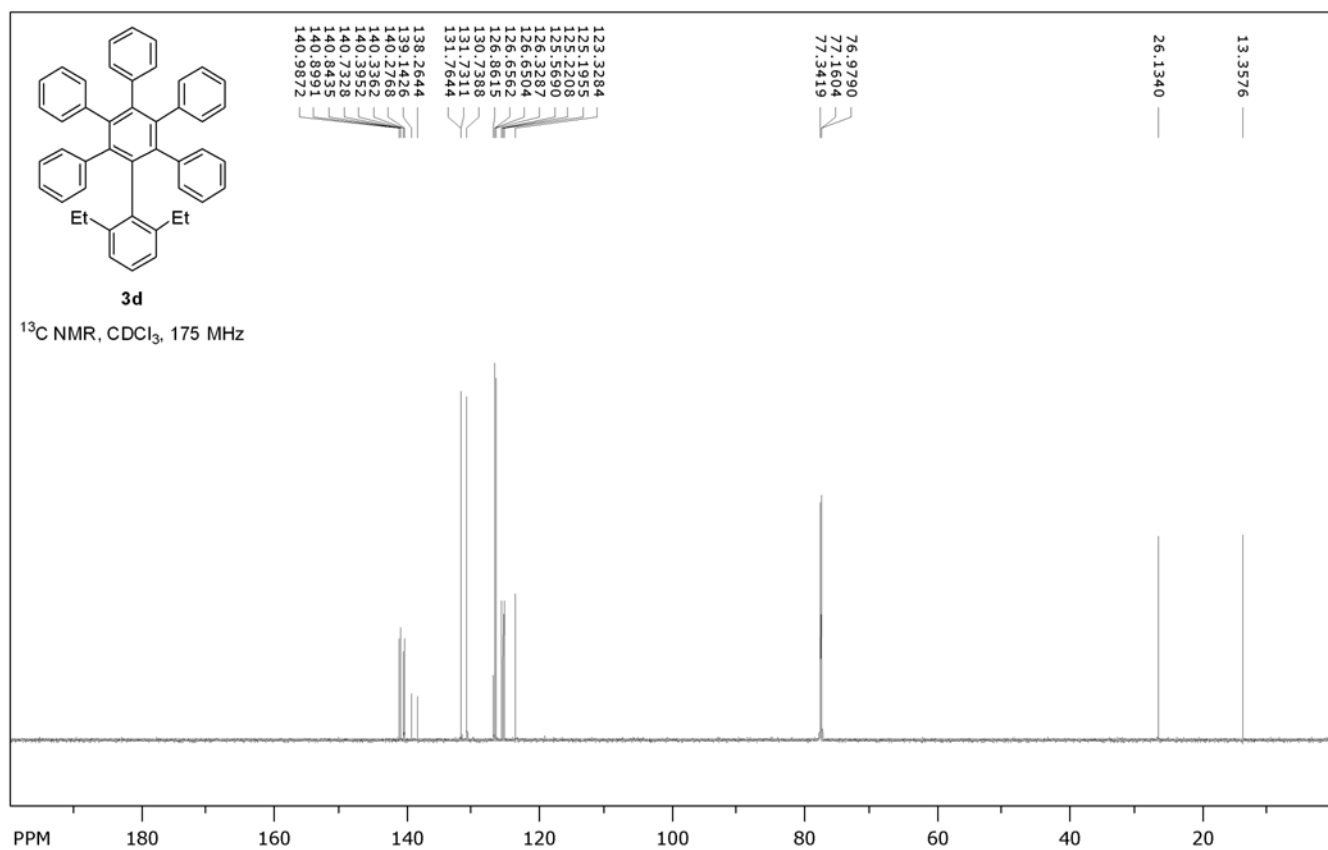

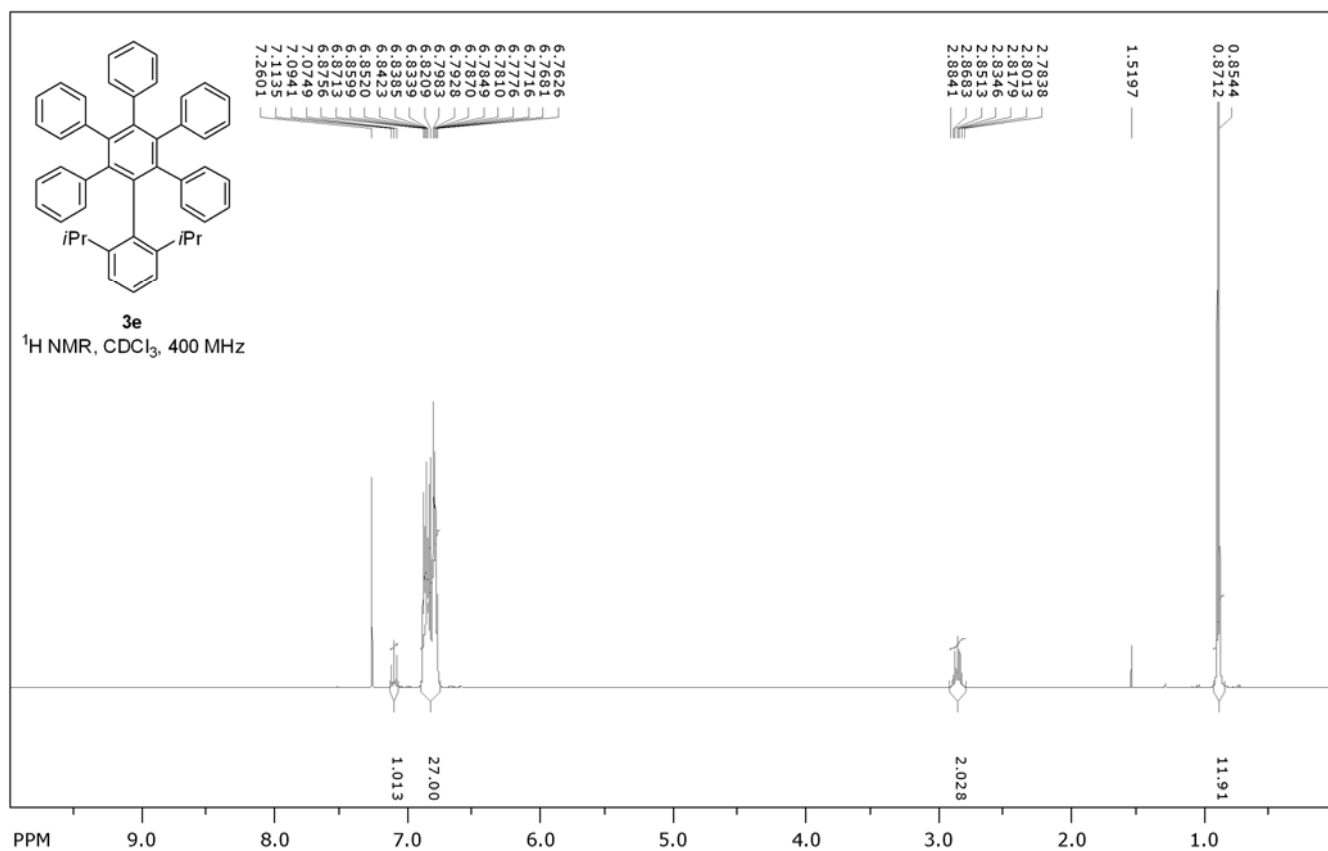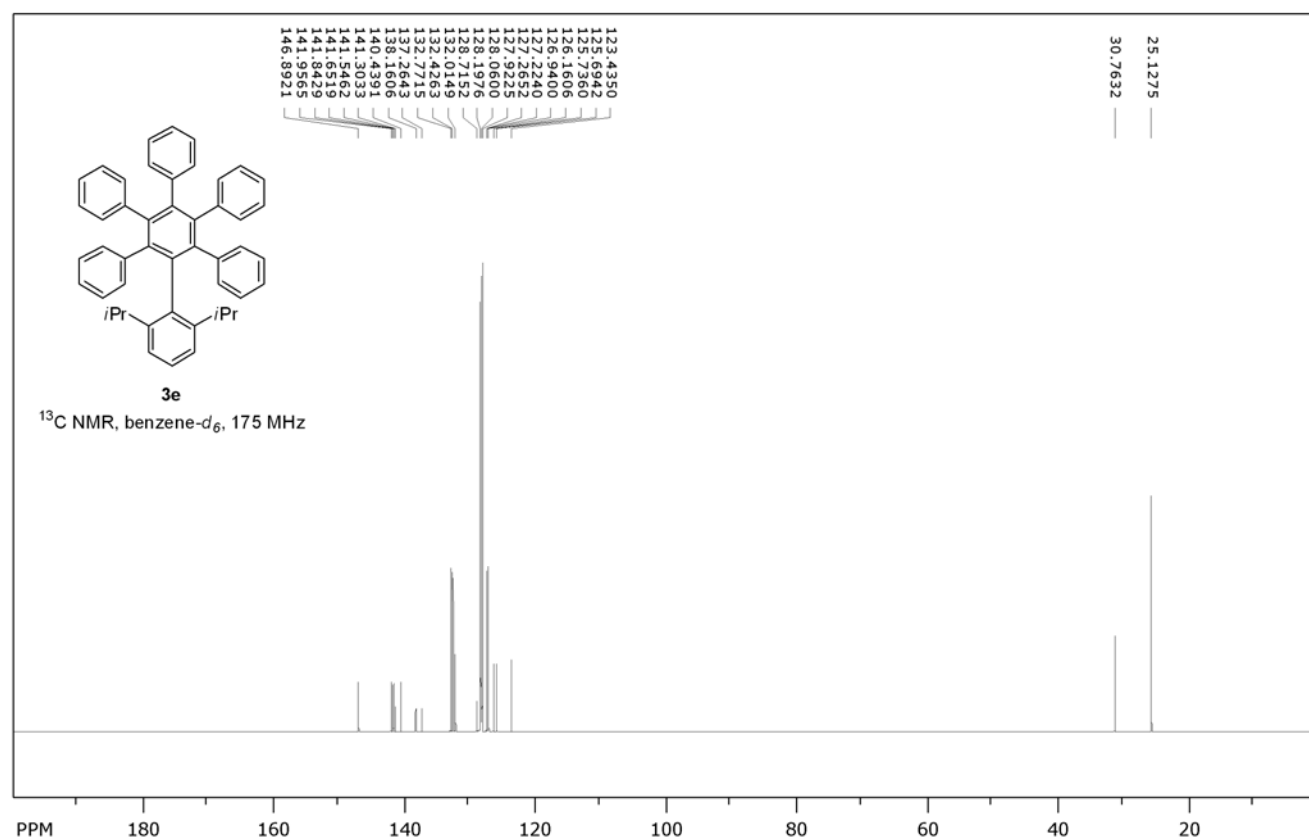

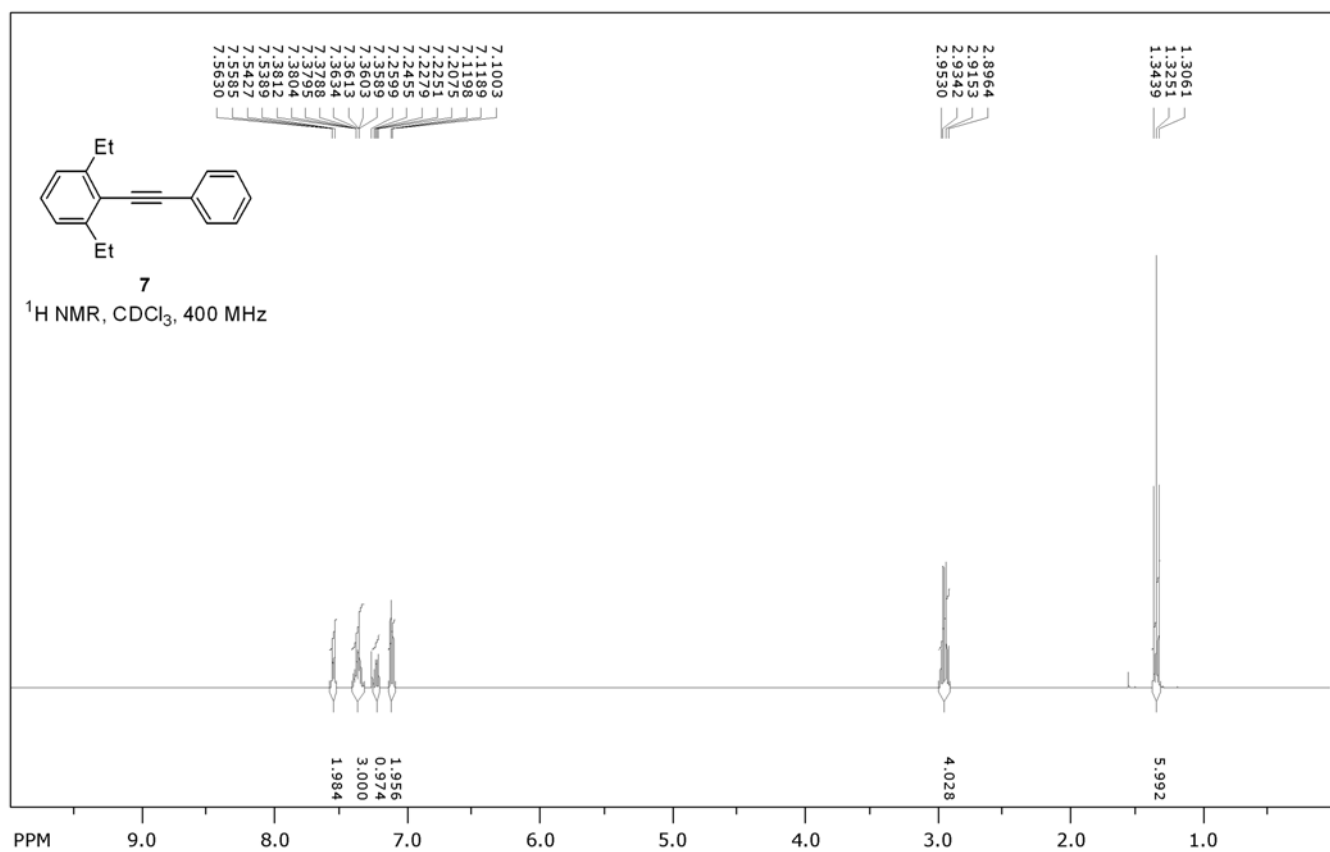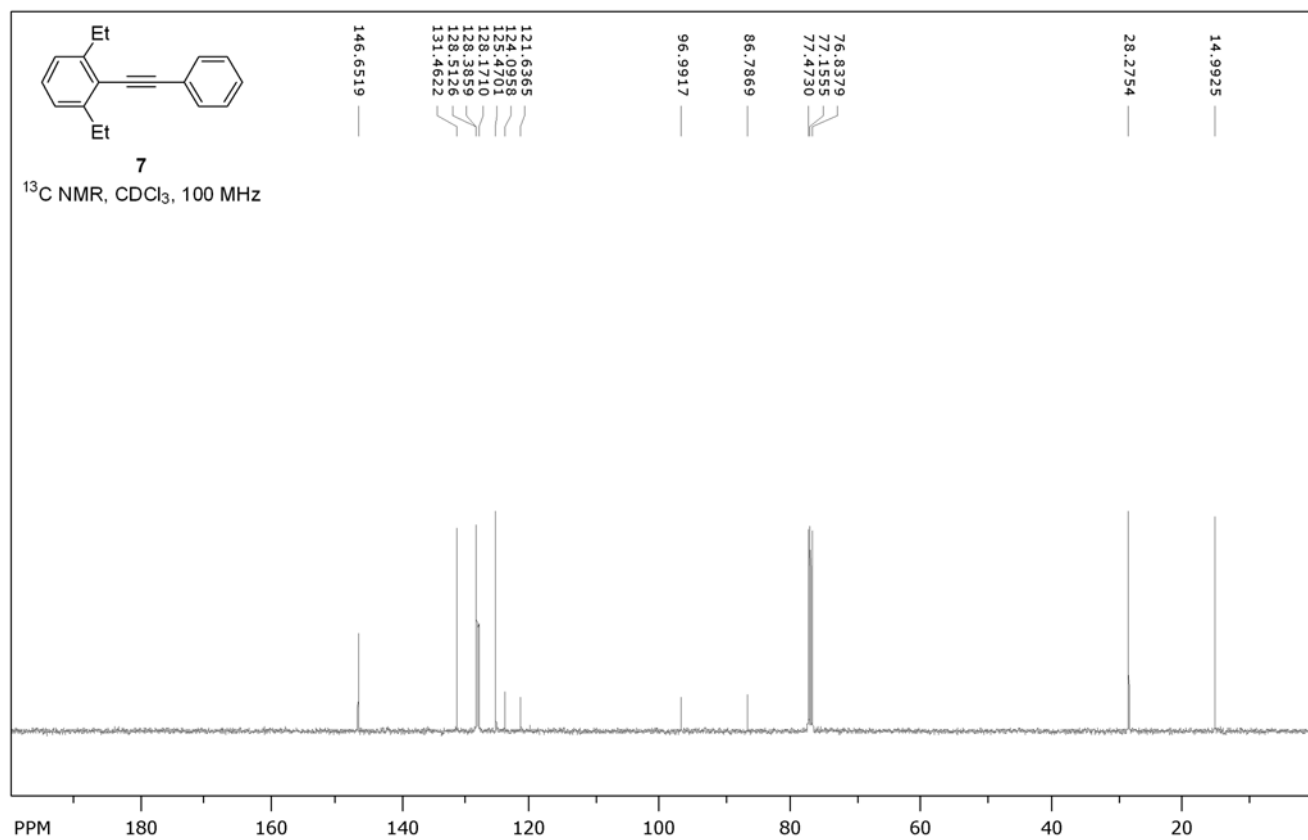

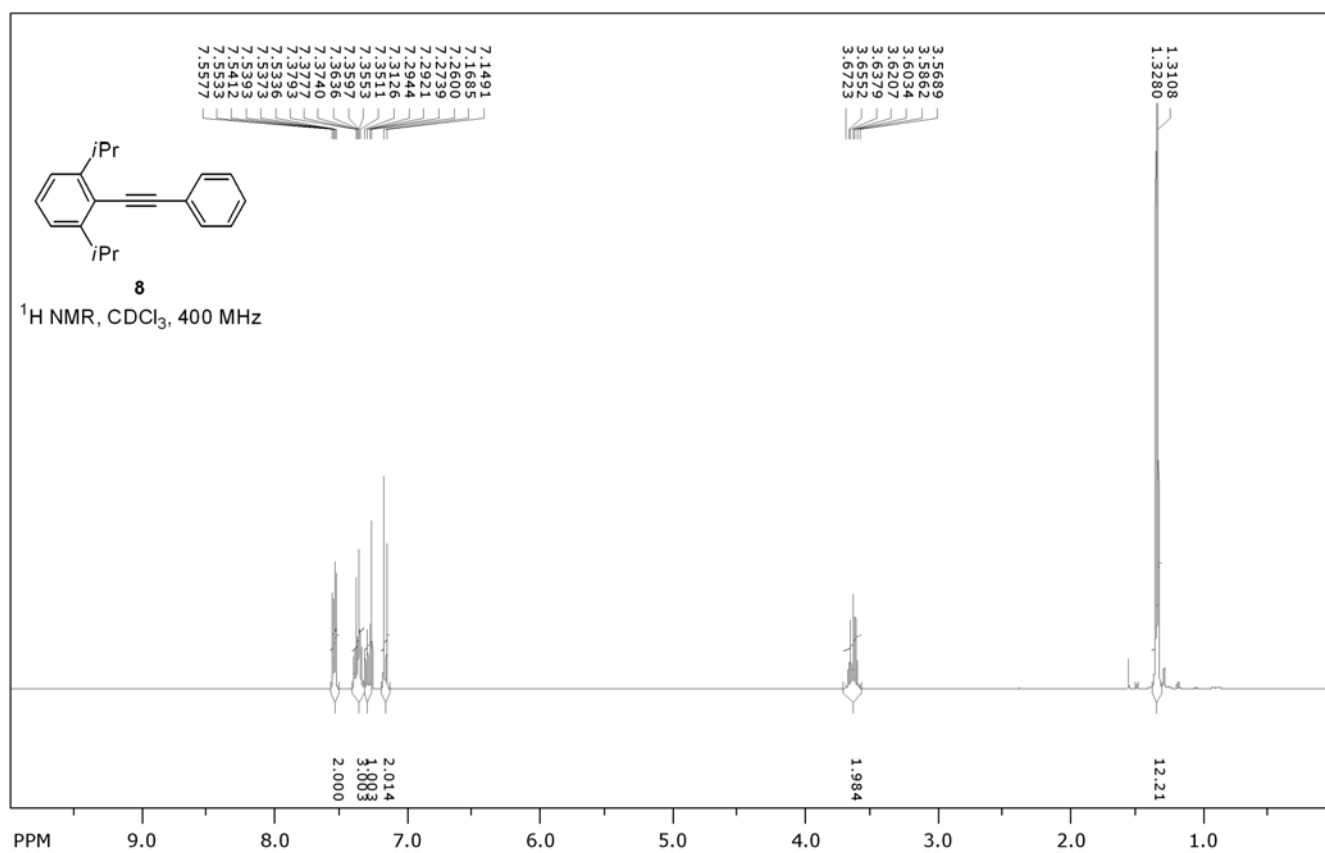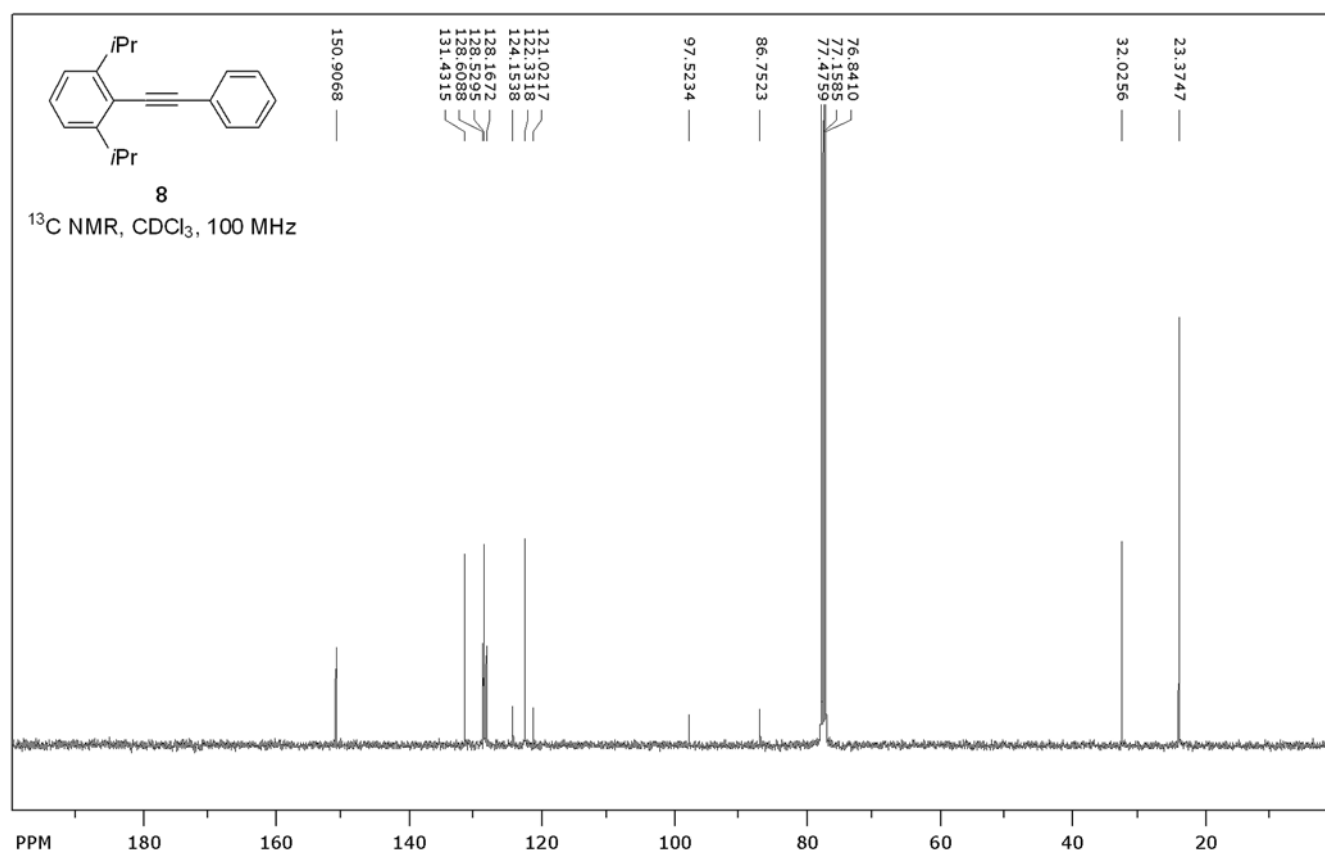

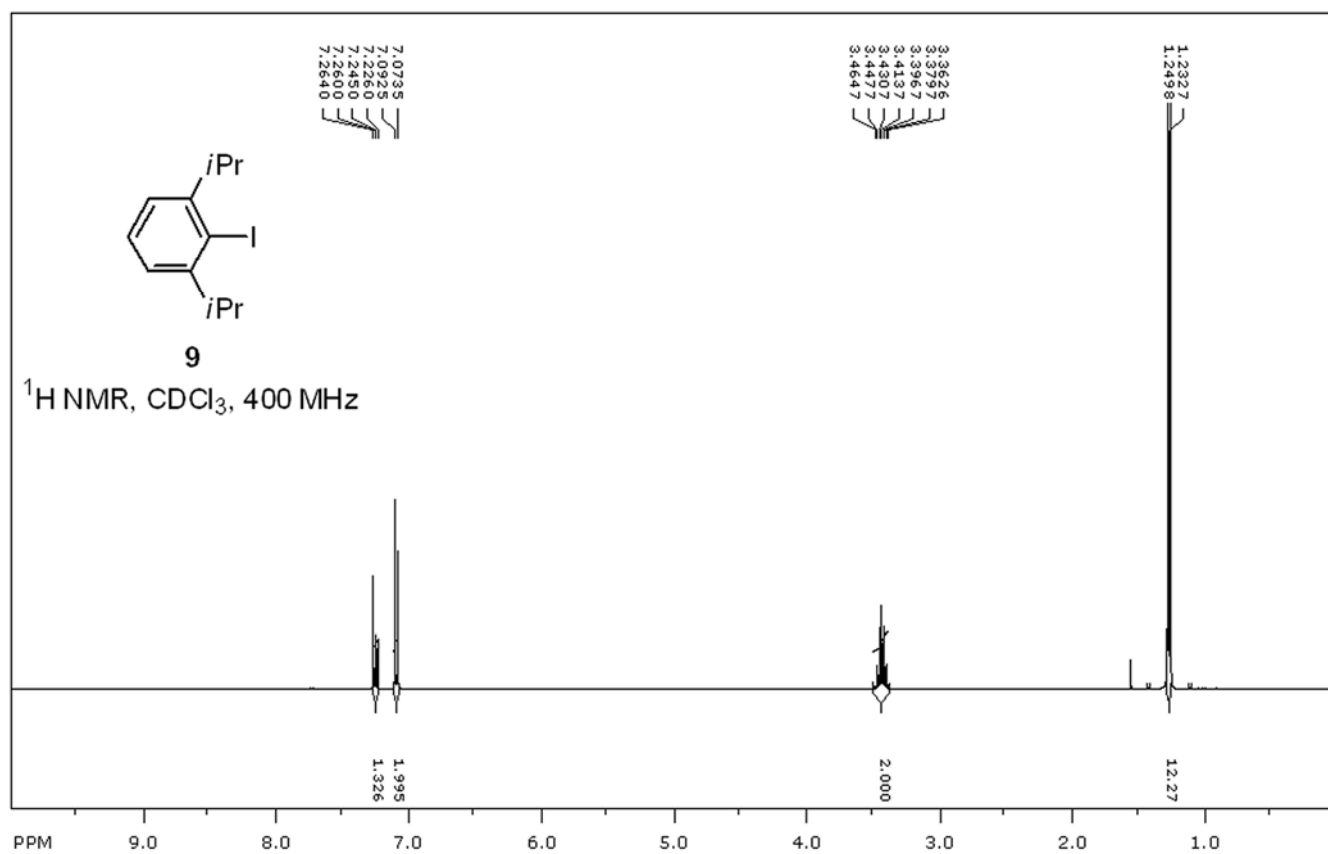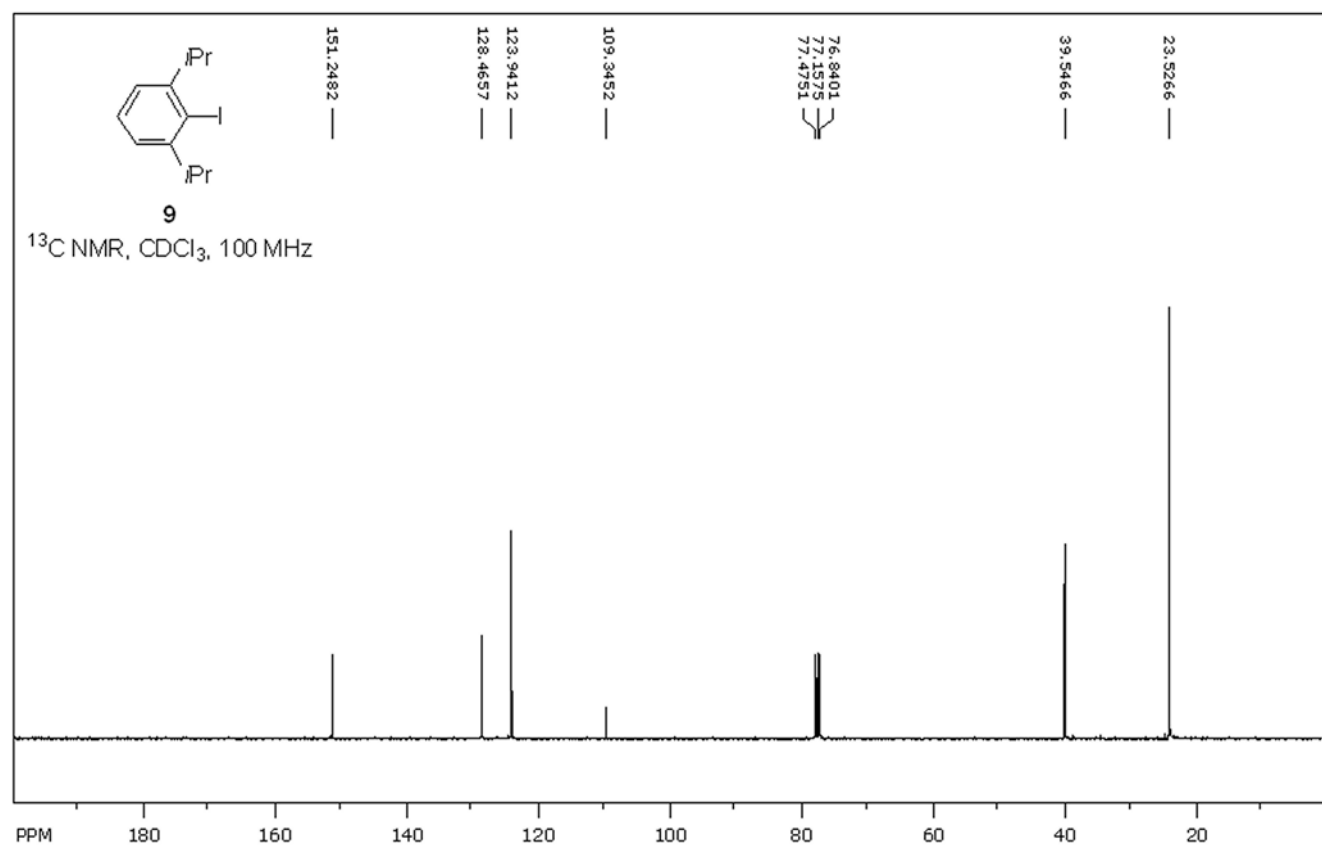

Supplement: Supplementary file 1 [file 4493809]
